# Supplementary material for: Modelling productivity of willow stands in Sweden
Source: Royal Society of Chemistry journal article supplement (doi:10.1039/c9fo00655a), 2003-12-01
Supplement: c9fo00655a1.pdf [file c9fo00655a1.pdf]

## Supporting information

### Interaction of Carbon Quantum Dots from Roasted Fish with Digestive Protease and Dopamine

Yukun Song,<sup>a,b</sup> Lin Cao,<sup>a,b</sup> Jiaqi Li,<sup>a,b</sup> Shuang Cong,<sup>a,b</sup> Dongmei Li,<sup>a,b</sup> Zhijie Bao<sup>a,b</sup> and

Mingqian Tan<sup>\* a,b</sup>

<sup>a</sup>*School of Food Science and Technology, Dalian Polytechnic University, National Engineering  
Research Center of Seafood, Qinggongyuan 1, Ganjingzi District, Dalian 116034, China*

<sup>b</sup>*Engineering Research Center of Seafood of Ministry of Education of China, Dalian 116034,  
China*

*\*Corresponding authors. Mingqian Tan, Tel: +86-411-86318657, E-mail: mqtan@dlpu.edu.cn*

ORCID: 0000-0002-7535-0035

Table S1. Thermodynamic parameters for interaction of pepsin and trypsin with CQDs

| Parameter                                     | Pepsin-CQDs  | Trypsin-CQDs |
|-----------------------------------------------|--------------|--------------|
| $K_a (\times 10^5 \text{ M}^{-1})$            | 1.96±0.29    | 3.91±0.43    |
| n                                             | 0.18±0.01    | 1.86±0.02    |
| $\Delta G (\text{kJ mol}^{-1})$               | -19.47±1.28  | -26.21±2.04  |
| $\Delta H (\text{kJ mol}^{-1})$               | -100.36±5.78 | -4.43±0.62   |
| $\Delta S (\text{J mol}^{-1} \text{ K}^{-1})$ | -271.44±6.82 | 73.08±4.19   |

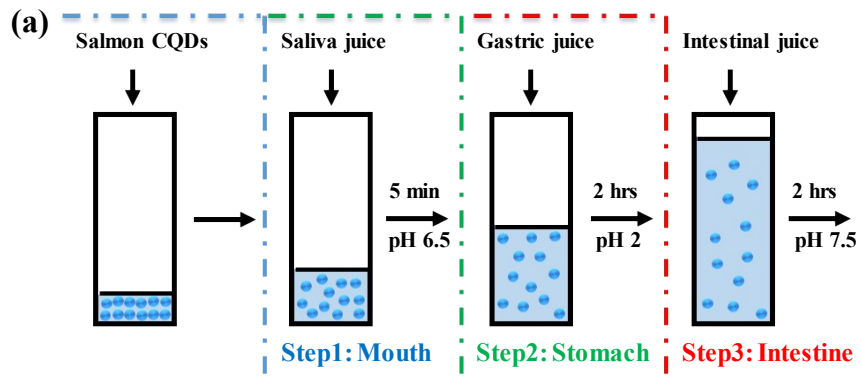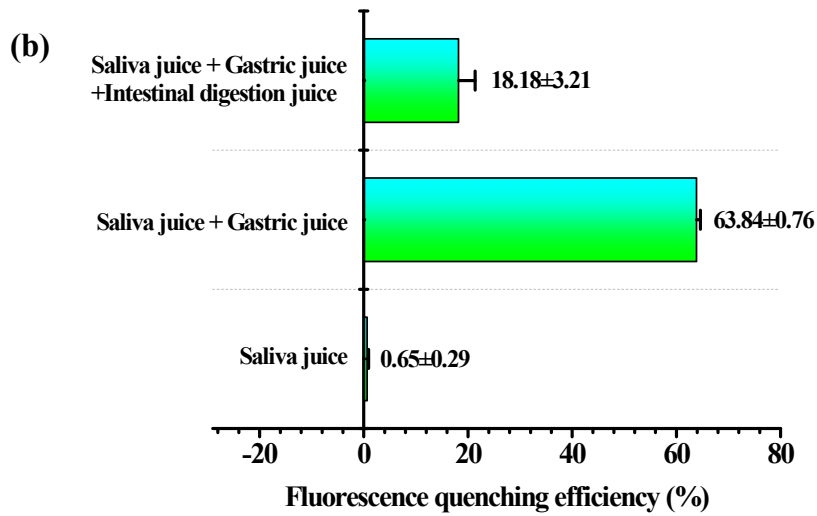

Figure S1. (a) Schematic presentation of in vitro digestion procedure of the salmon CQDs, (b) Fluorescence quenching efficiency of the salmon CQDs when they were added into saliva juice, gastric juice and intestine juice to simulate the mouth, stomach and intestine digestion.

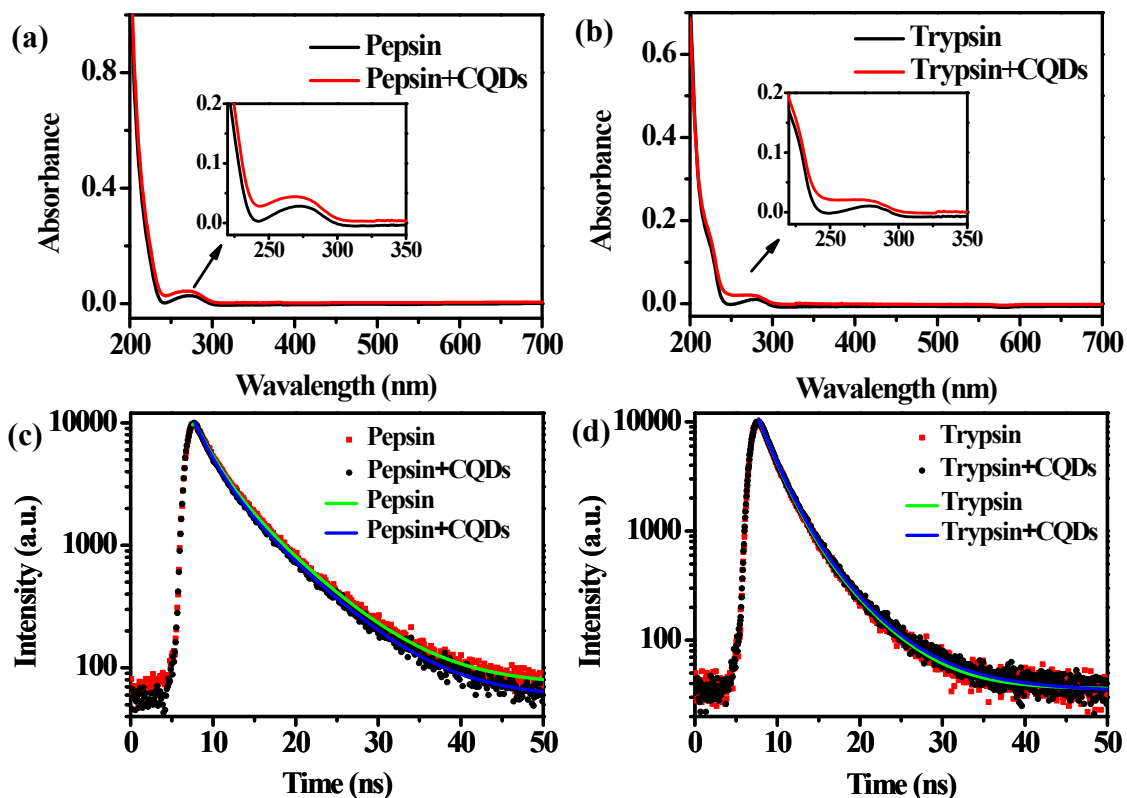

Figure S2. UV-Vis absorption spectra of pepsin and pepsin with CQDs (a), trypsin and trypsin with CQDs (b). Fluorescence decay traces of pepsin and pepsin with CQDs (c), trypsin and trypsin with CQDs (d). Concentration<sub>(pepsin/trypsin)</sub> =  $1.0 \times 10^{-5}$  mol L<sup>-1</sup>, Concentration<sub>(CQDs)</sub> =  $12.0 \times 10^{-8}$  mol L<sup>-1</sup>, T = 298 K.

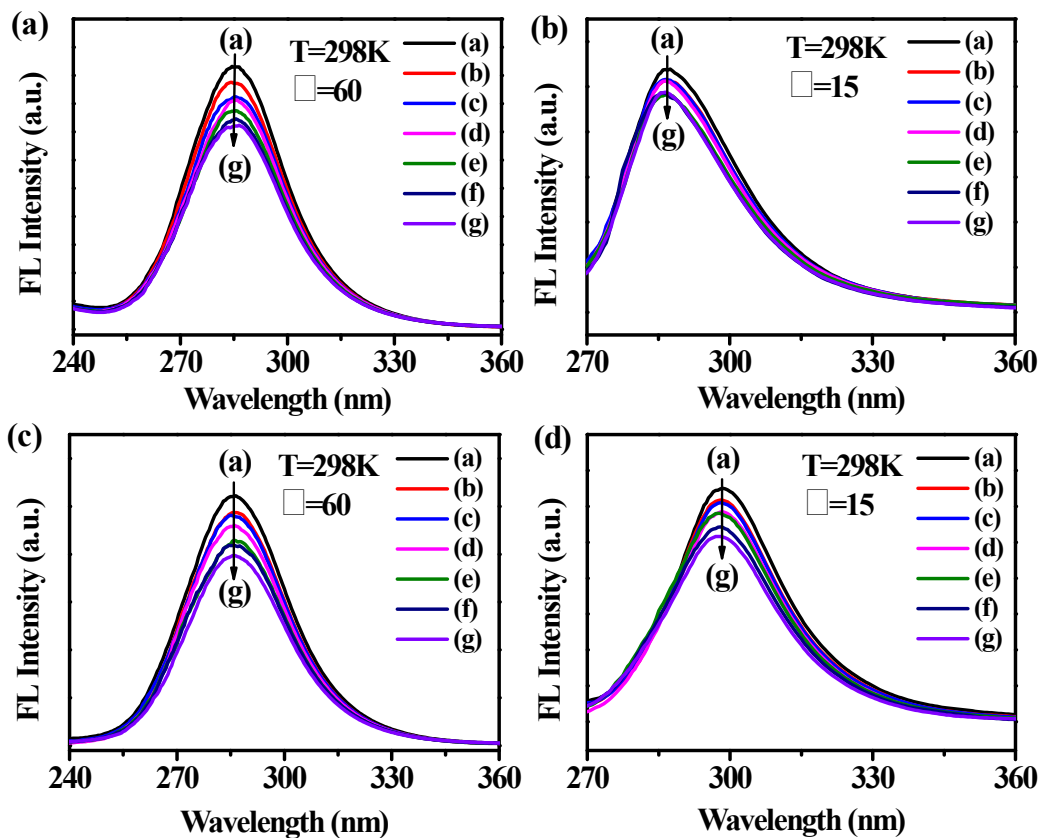

Figure S3. Effect of CQDs on the synchronous fluorescence spectra of pepsin at  $\Delta\lambda = 60$  nm (a) and  $\Delta\lambda = 15$  nm (b). Effect of CQDs on the synchronous fluorescence spectra of trypsin at  $\Delta\lambda = 60$  nm (c) and  $\Delta\lambda = 15$  nm (d),  $\text{Concentration}_{(\text{trypsin})} = \text{Concentration}_{(\text{pepsin})} = 1.0 \times 10^{-5} \text{ mol}\cdot\text{L}^{-1}$ .  $\text{Concentration}_{(\text{CQDs})}$  of a-g: 0, 2.0, 4.0, 6.0, 8.0, 10.0, and  $12.0 \times 10^{-8} \text{ mol L}^{-1}$ , respectively, 298K.
